# Supplementary material for: Facile synthesis of Camellia oleifera shell-derived hard carbon as an anode material for lithium-ion batteries
Source: PubMed Central journal article supplement — RSC Adv. 2019 Jul 1;9(35):20424–31. doi: 10.1039/c9ra03345a (PMC9065565; doi:10.1039/c9ra03345a), 2019-07-01
Supplement: RA-009-C9RA03345A-s001.pdf [file RA-009-C9RA03345A-s001.pdf]

# Electronic Supplementary Material (ESI) for RSC Advances. This journal is © The Royal Society of Chemistry 2019

## Supporting Information

### Facile synthesis of *Camellia oleifera* shells-derived hard carbon as an anode material for lithium-ion batteries

Beibei Ma,<sup>a</sup> Yewei Huang,<sup>a</sup> Zhenzhen Nie,<sup>a</sup> Xiaobin Qiu,<sup>a</sup> Dawei Su,<sup>b\*</sup> Guoxiu

Wang,<sup>b\*</sup> Jianming Yuan,<sup>c</sup> Xiuqiang Xie<sup>d</sup> and Zhenjun Wu<sup>a\*</sup>

*a. College of Chemistry and Chemical Engineering, Hunan University, Changsha 410082, P.R.*

*China. E-mail: [wooawt@163.com](mailto:wooawt@163.com)*

*b. Centre for Clean Energy Technology, School of Mathematical and Physical Sciences, Faculty  
of Science, University of Technology Sydney, NSW 2007, Australia. E-mail:*

*dawei.su@uts.edu.au, E-mail: [Guoxiu.Wang@uts.edu.au](mailto:Guoxiu.Wang@uts.edu.au)*

*c, d. College of Materials Science and Engineering, Hunan University, Changsha 410082, P. R.  
China*

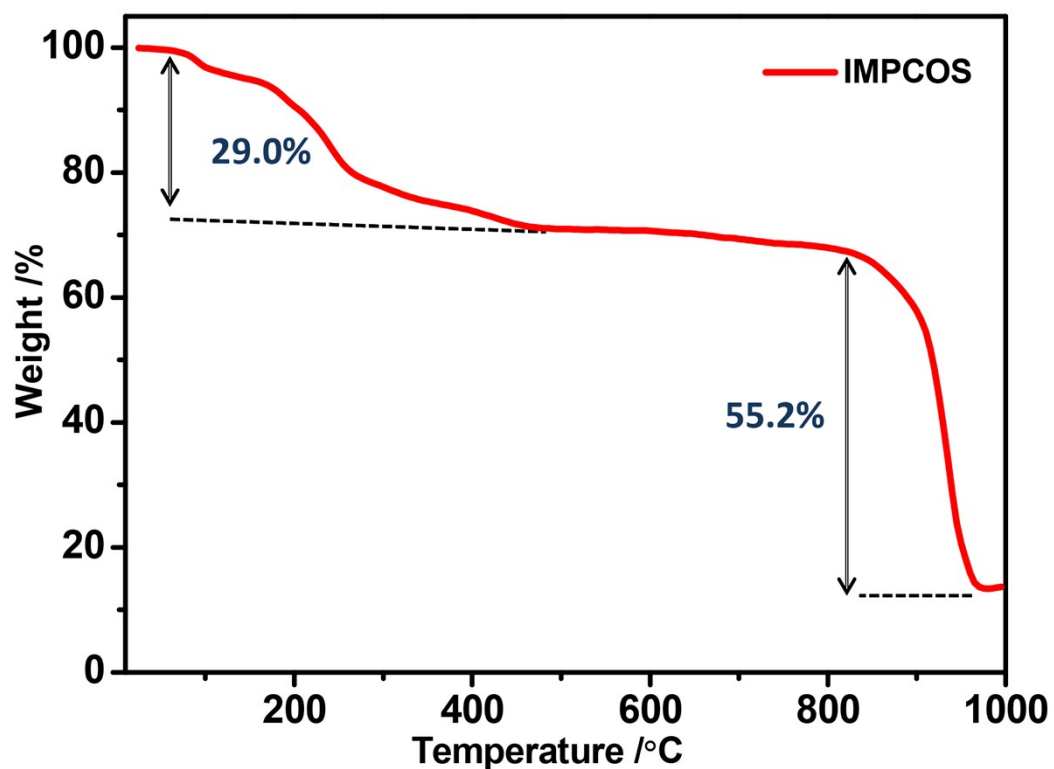

Fig. S1 TG curve of the impregnated *Camellia oleifera* shells.

In our synthesis route, there occurs several reactions during  $K_2CO_3$  activation process. When the temperature was higher than 700 °C, the  $K_2CO_3$  started to decompose, generating  $K_2O$  and CO. As the temperature rises further, K vapor ( $T_{ev}$ 759 °C) and CO are produced. The mechanism of  $K_2CO_3$  activation can be summarized as follows:

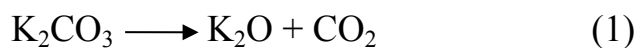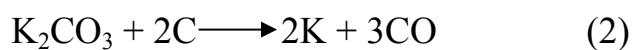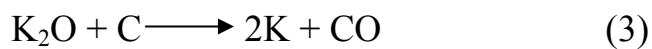

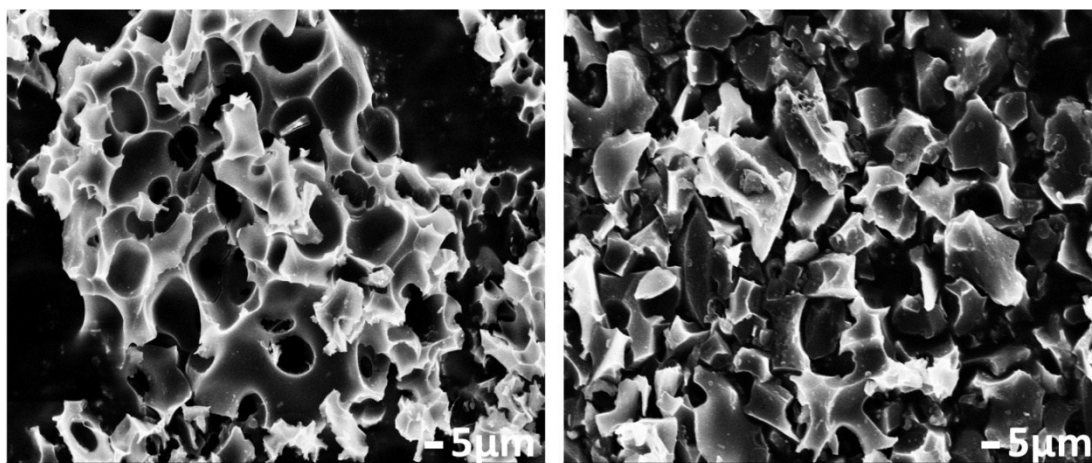

Fig. S2 SEM of COSDHC800-1 and COSDHC800-2.

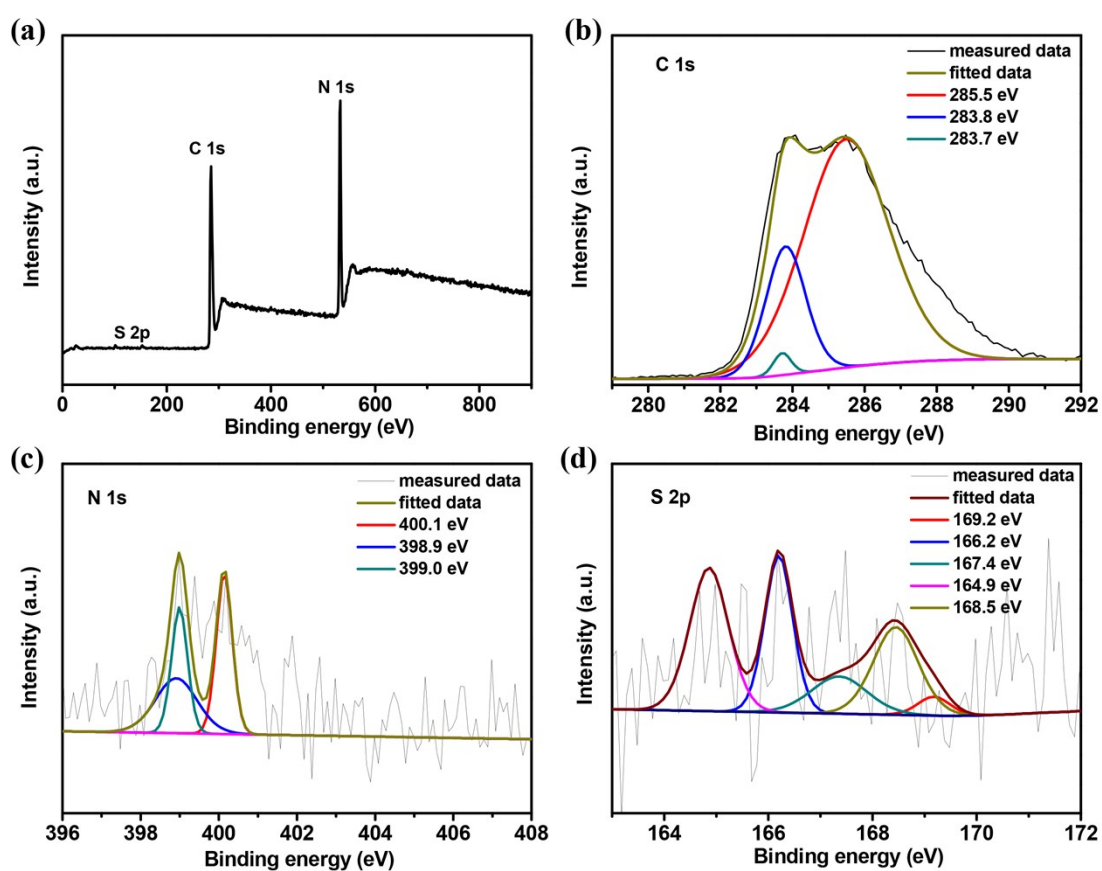

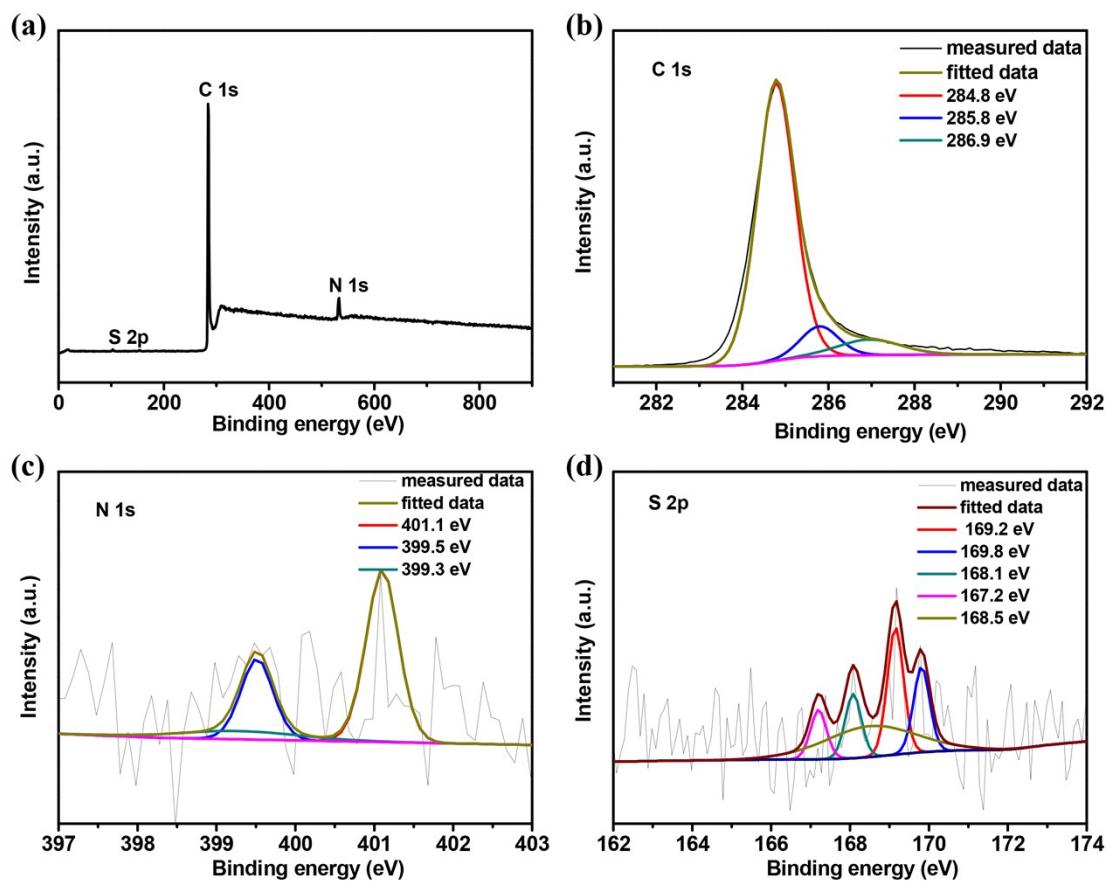

Fig. S3 i) XPS of raw material, ii) XPS of COSDHC900-1.

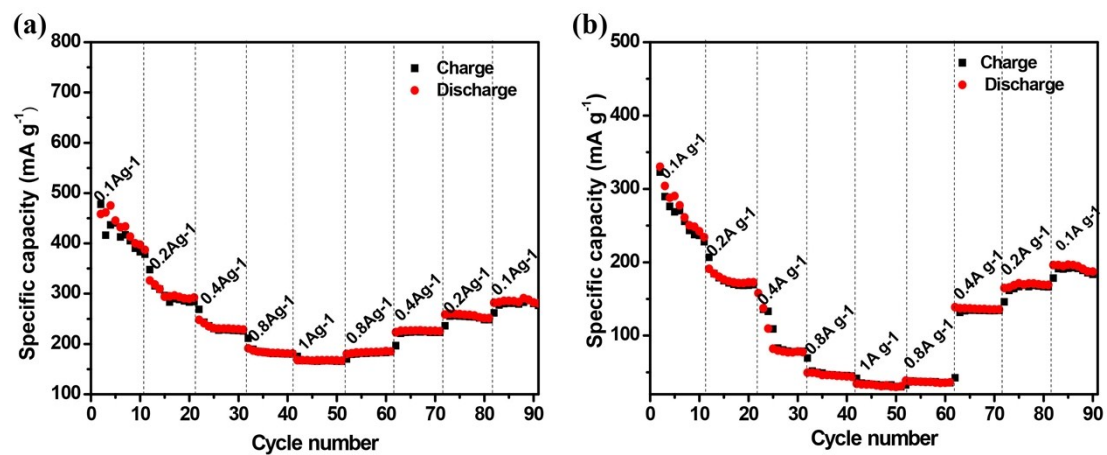

Fig. S4 Rate performance of COSDHC800-1 and COSDHC800-2.

## References:

- [1]. Y. Mao, D. Hui, B. Xu, Z. Lin, Y. Hu, C. Zhao, Z. Wang, L. Chen and Y. Yang, *Energy & Environmental Science*, 2012, 5, 7950-7955.
- [2]. H. Yang, R. Yan, H. Chen, D. H. Lee and C. Zheng, *Fuel*, 2007, 86, 1781-1788.
- [3]. J. Xiong, Q. Pan, F. Zheng, X. Xiong, C. Yang, D. Hu and C. Huang, *Frontiers in Chemistry*, 2018, 6, 78.
- [4]. Shilpa, R. Kumar and A. Sharma, *Journal of Applied Electrochemistry*, 2017, 1-13.
- [5]. K. Chen and D. Xue, *Chinese Journal of Chemistry*, 2017, 35.
- [6]. L. Chen, Y. Zhang, C. Lin, W. Yang, Y. Meng, Y. Guo, M. Li and D. Xiao, J. *Mater. Chem. A*, 2014, 2, 9684-9690.
